# Supplementary material for: Automatic oxidation threshold recognition of XAFS data using supervised machine learning
Source: Royal Society of Chemistry journal article supplement (doi:10.1039/c9me00043g), 2019-01-01
Supplement: c9me00043g1.pdf [file c9me00043g1.pdf]

## Supporting information

# Classifying oxide states in XAS spectra using machine learning

Itsuki Miyazato,<sup>\*a,b</sup> Lauren Takahashi,<sup>b</sup> and Keisuke Takahashi<sup>b,c</sup>

<sup>a</sup> Graduate School of Engineering, Hokkaido University, N-13, W-8, Sapporo 060-8628, Japan. E-mail: [miyazato@eng.hokudai.ac.jp](mailto:miyazato@eng.hokudai.ac.jp)

<sup>b</sup> Center for Materials research by Information Integration (CMI 2), National Institute for Materials Science (NIMS), 1-2-1 Sengen, Tsukuba, Ibaraki 305-0047, Japan.

<sup>c</sup> Institute for Catalysis, Hokkaido University, N21, W10, Kita-ku, Sapporo 001-0021, Japan.

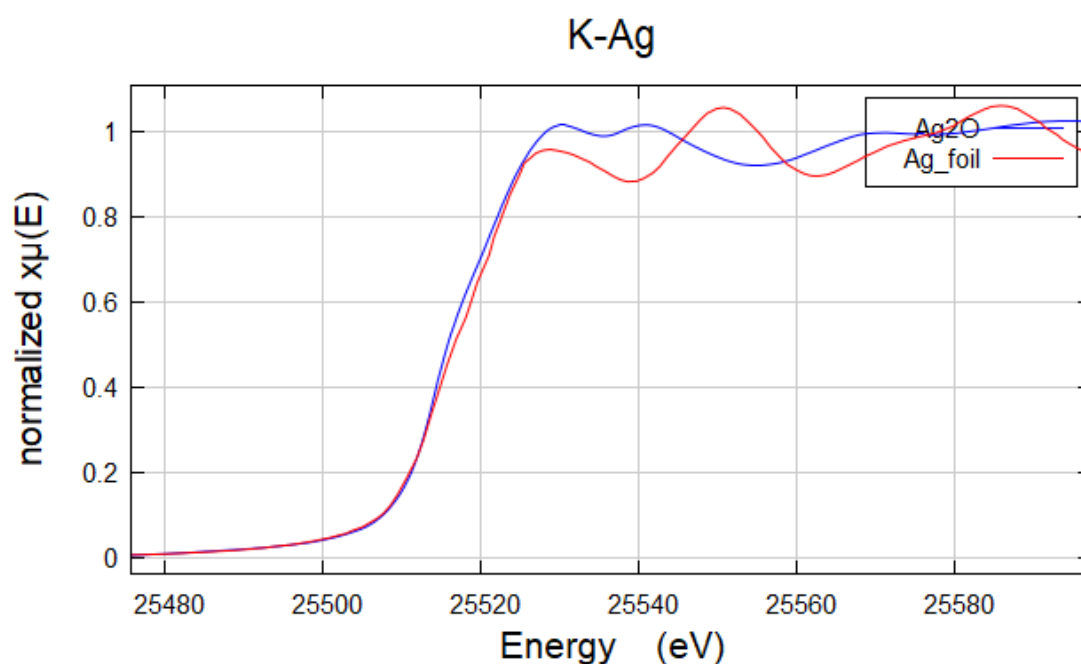

Figure S- 1 Source XANES Spectra for data mining (Ag-K edge)

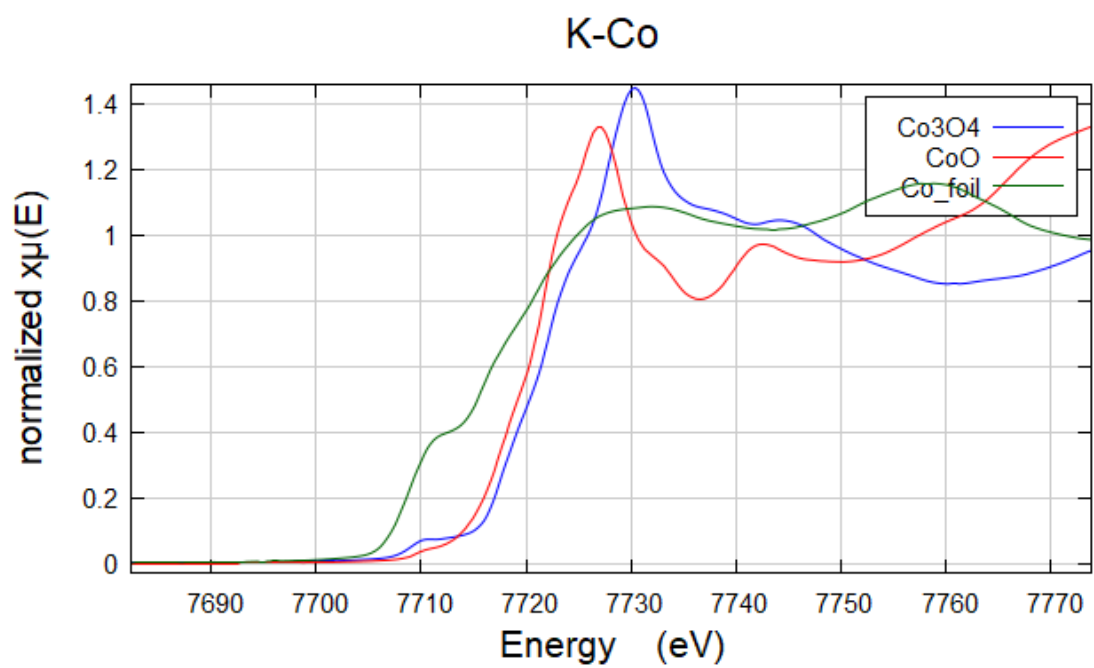

Figure S- 2 Analyzed XANES Spectra of Co-K edge

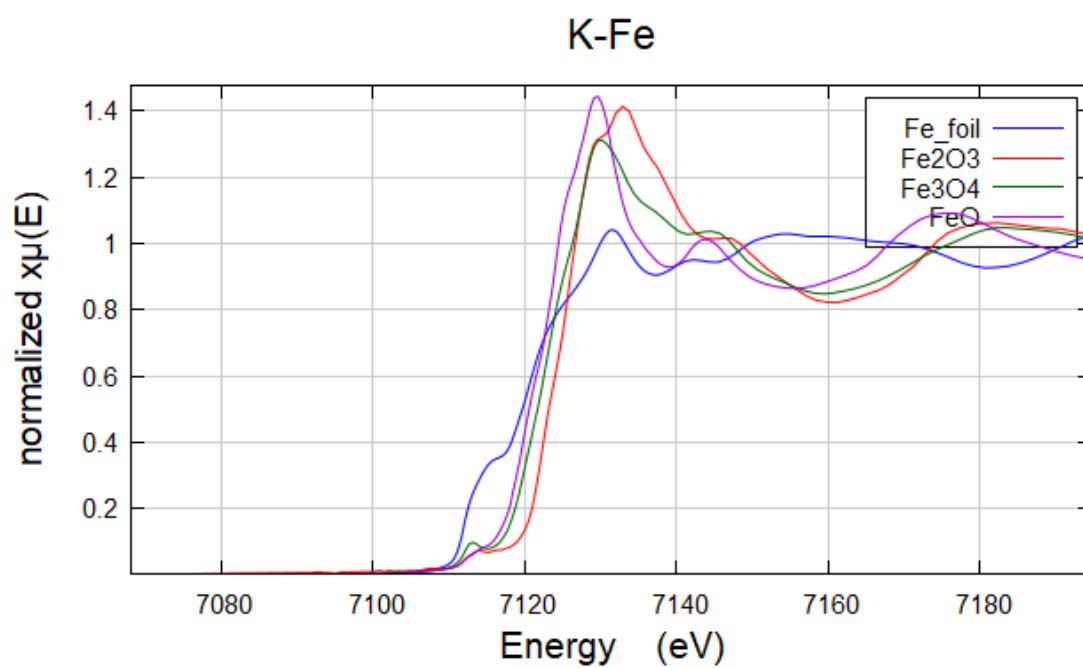

Figure S- 3 Source XANES Spectra for data mining (Fe-K edge)

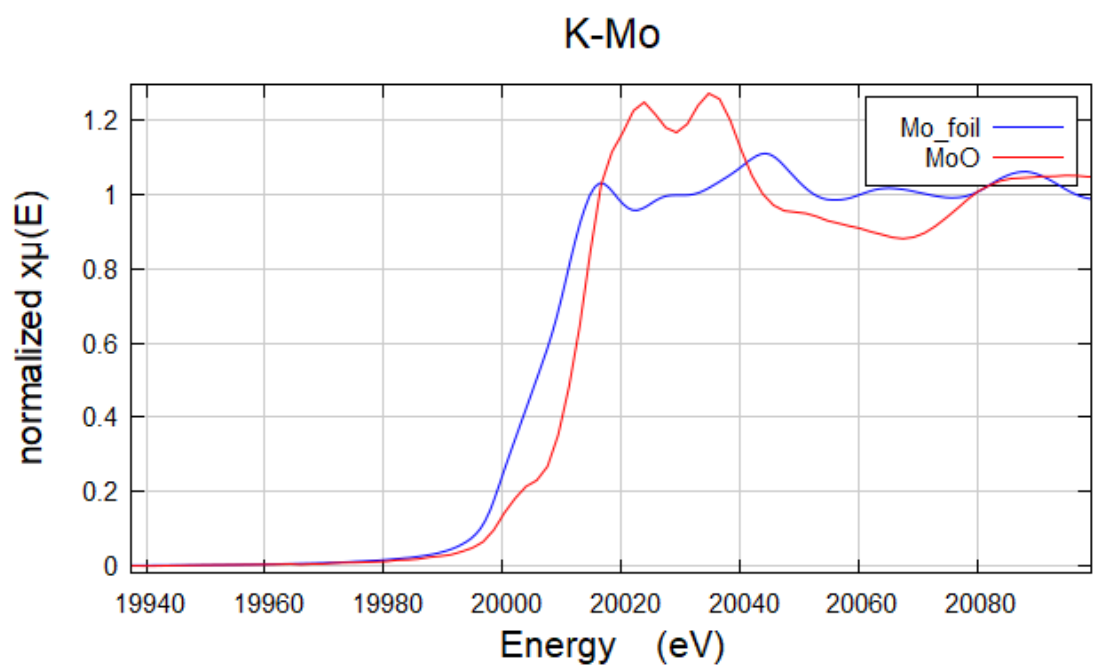

Figure S- 4 Analyzed XANES Spectra of Mo-K edge

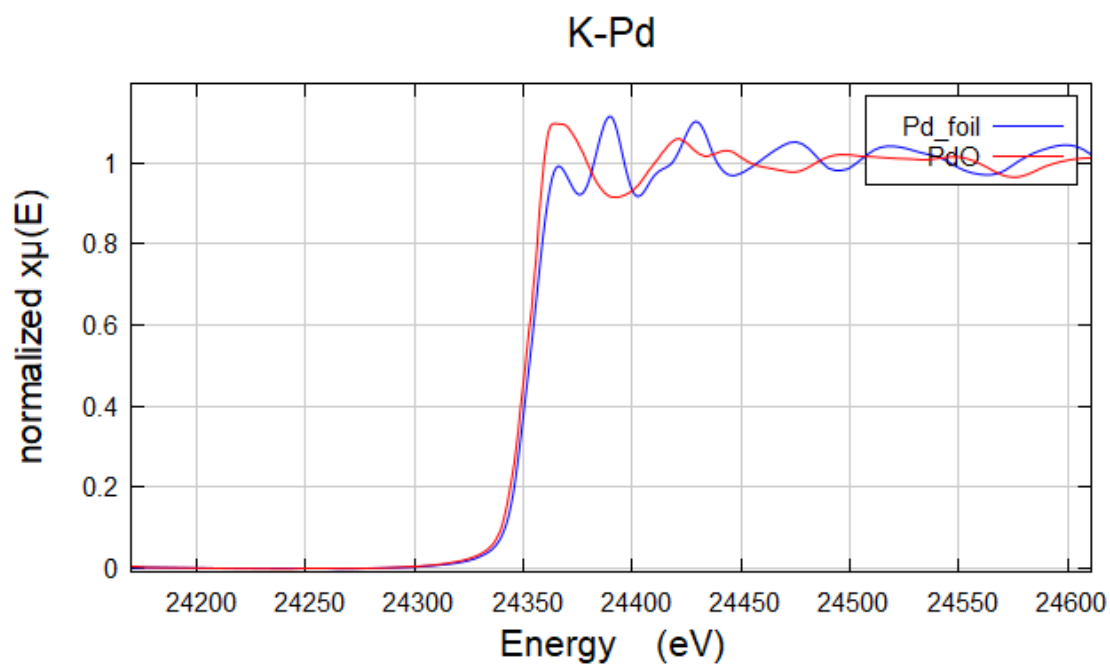

Figure S- 5 Source XANES Spectra for data mining ( Pd-K edge)

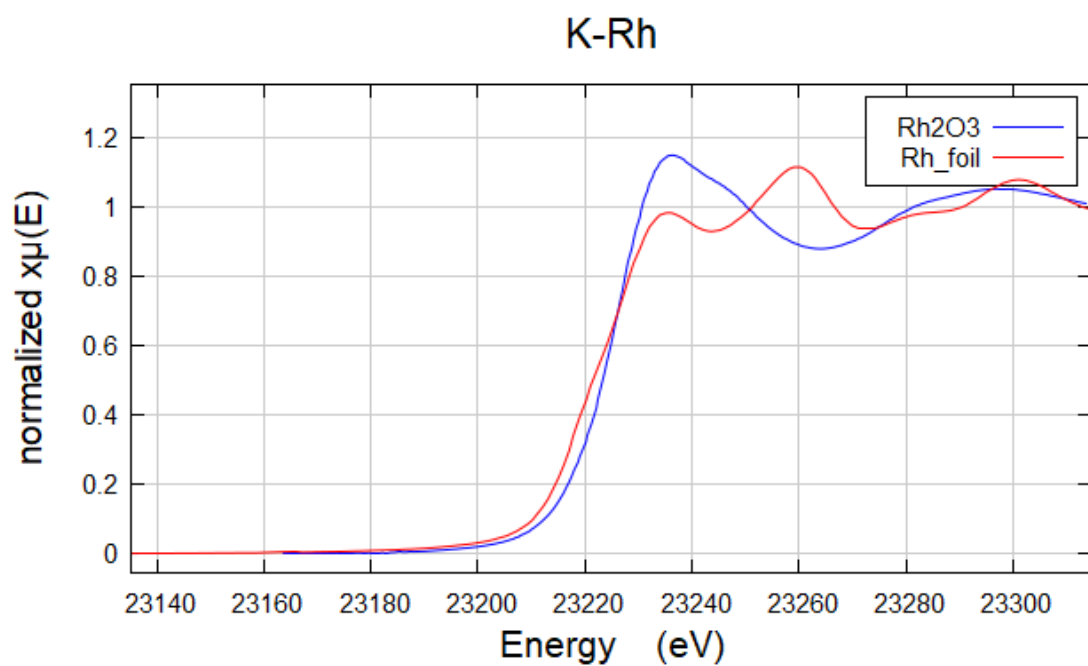

Figure S- 6 Source XANES Spectra for data mining (Rh-K edge)

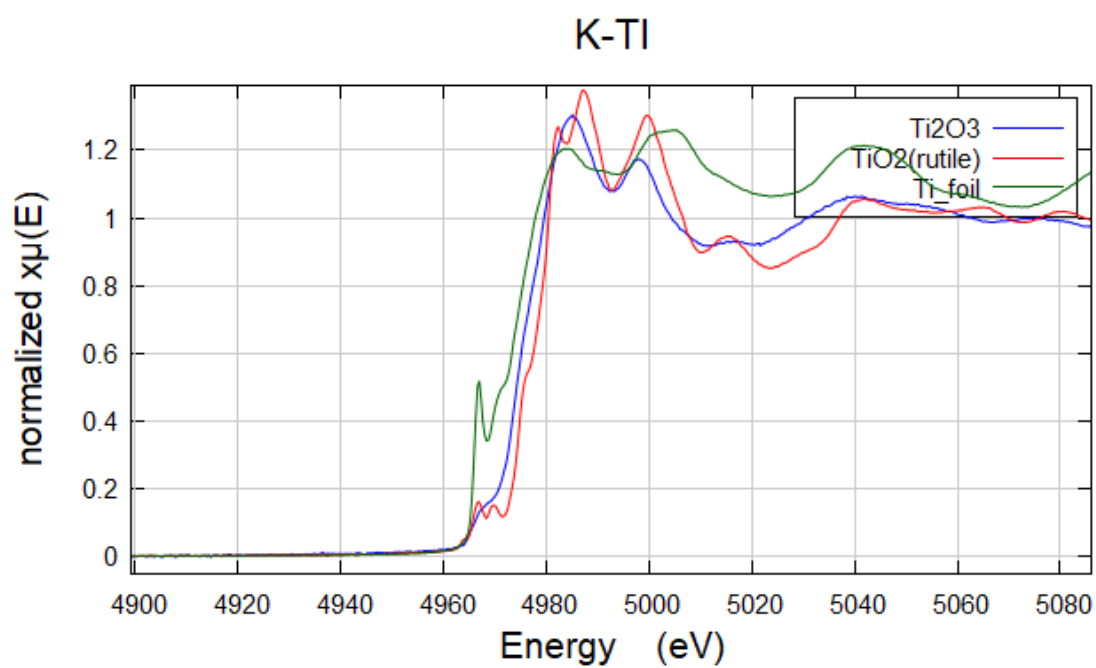

Figure S- 7 Source XANES Spectra for data mining (Ti-K edge)

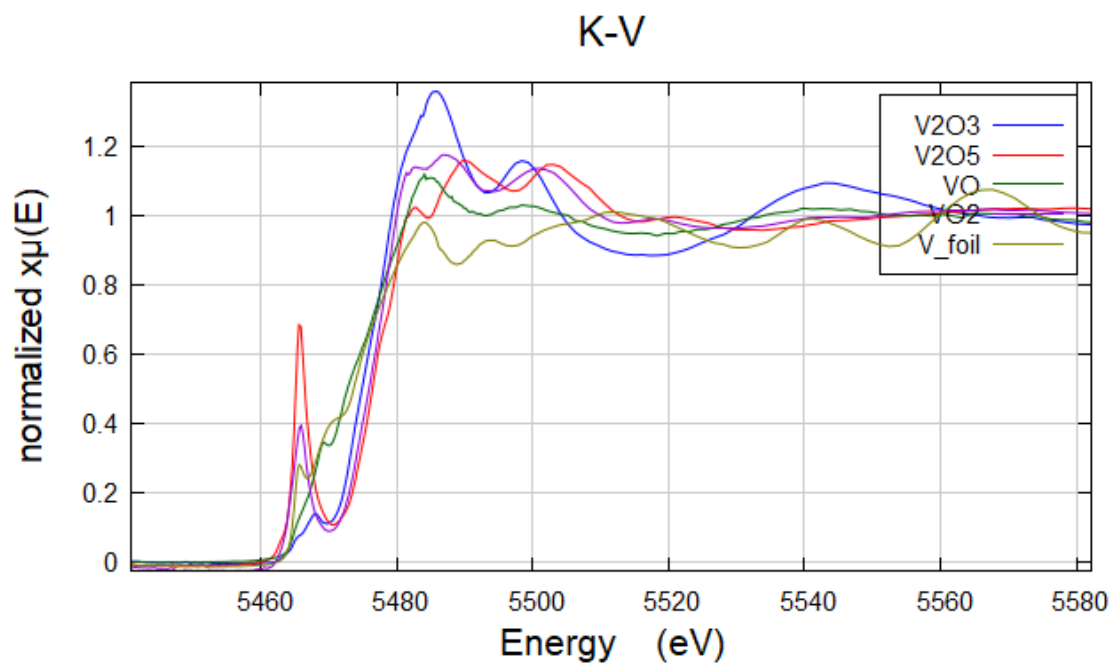

Figure S- 8 Source XANES Spectra for data mining (V-K edge)

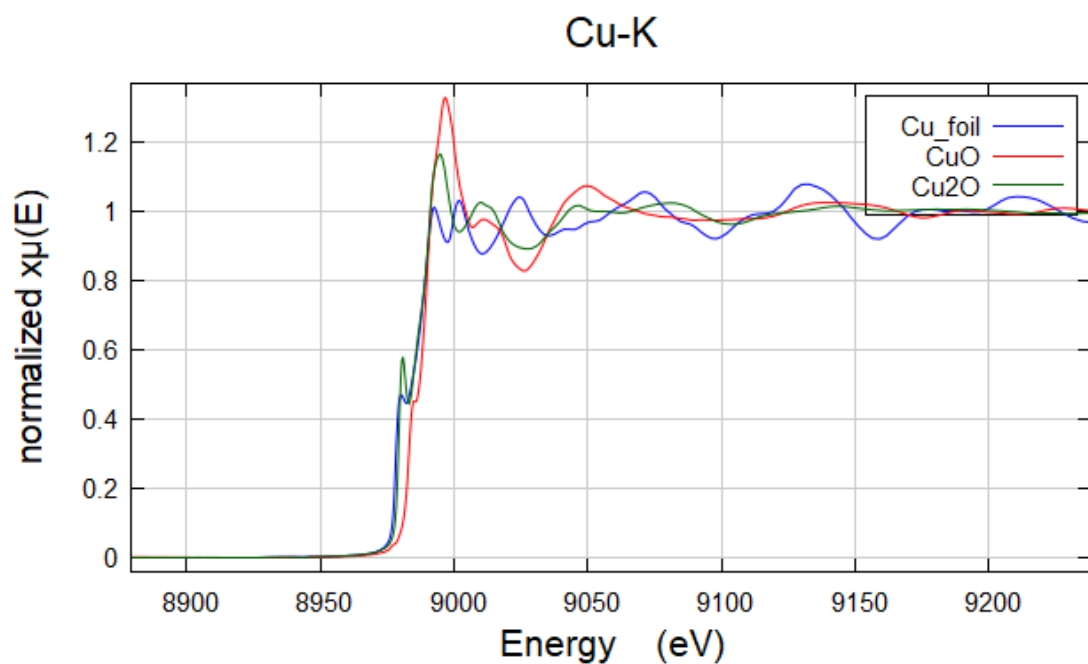

Figure S- 9 Source XANES Spectra for oxidation state prediction (Cu-K edge)

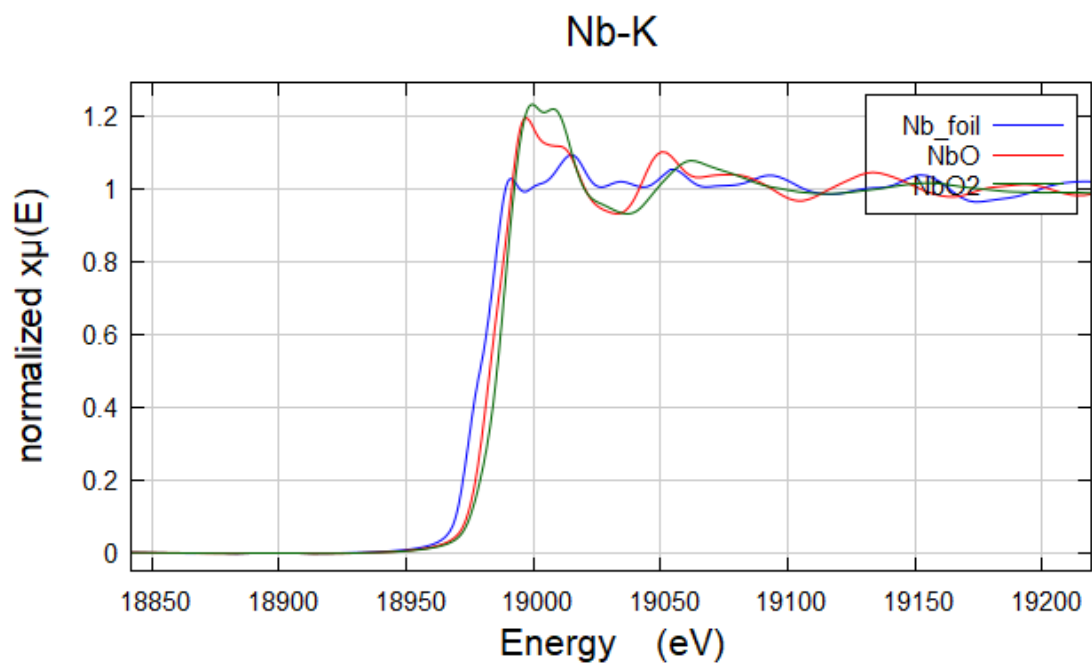

Figure S- 10 Source XANES Spectra for oxidation state prediction (Nb-K edge)

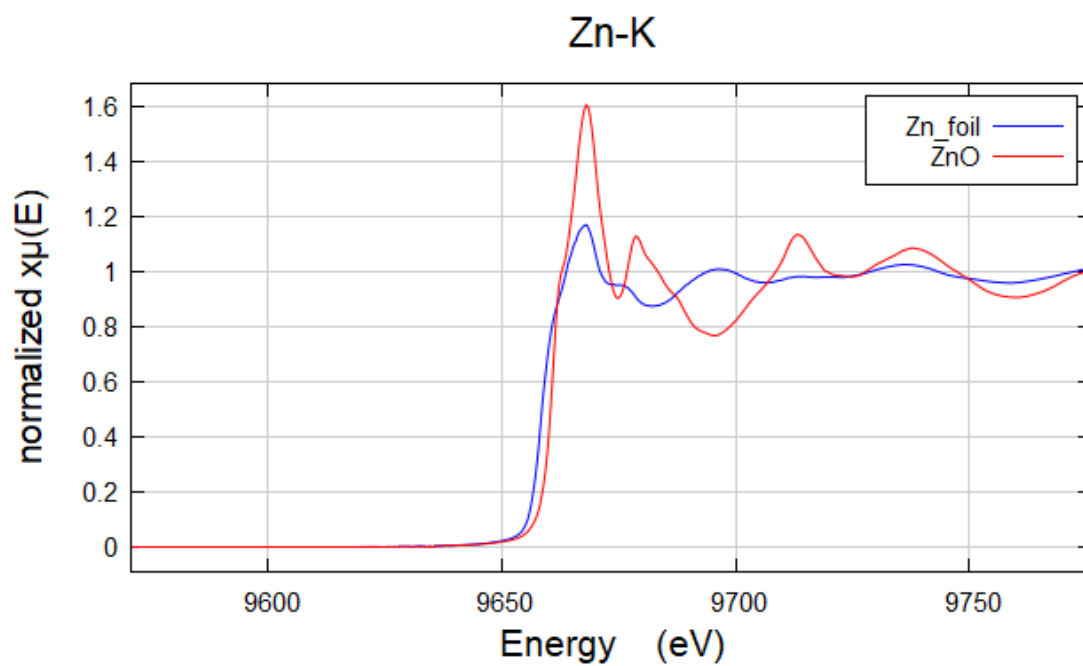

Figure S- 11 Source XANES Spectra for oxidation state prediction (Zn-K edge)

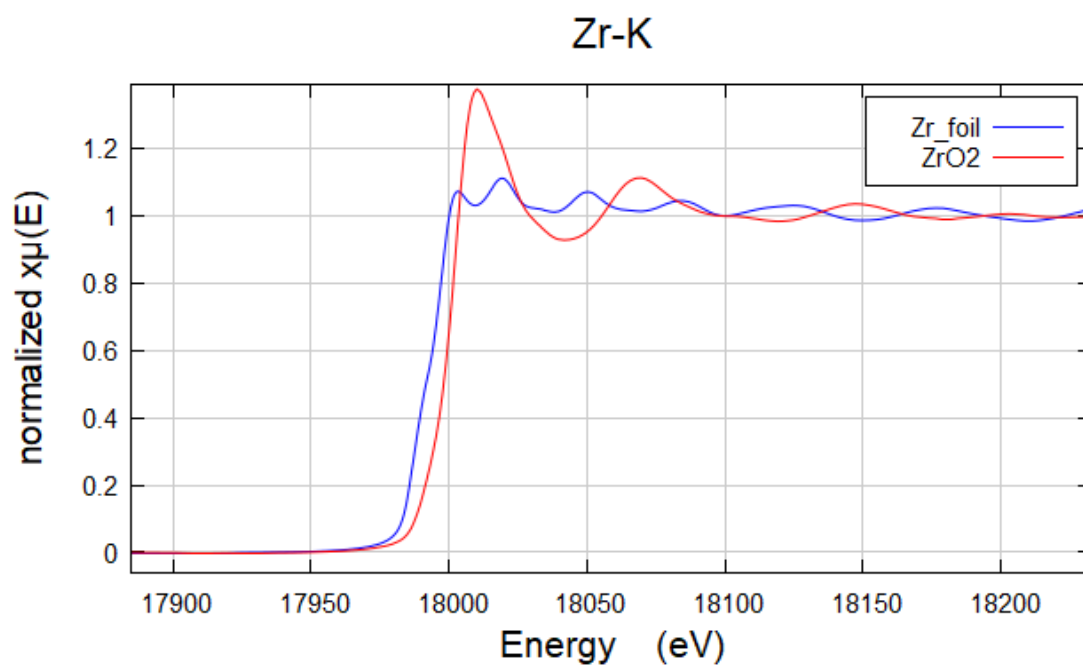

Figure S- 12 Source XANES Spectra for oxidation state prediction (Zr-K edge)

**Table S- 1 The list of learned data for data mining.**

| Name of Oxide                  | O <sub>stat</sub> | O <sub>clasa</sub><br>(Target) | Edge | T <sub>atom</sub> | Trained descriptors |                      |                      |                      |                      |                      |                      |                      |                      |                      |
|--------------------------------|-------------------|--------------------------------|------|-------------------|---------------------|----------------------|----------------------|----------------------|----------------------|----------------------|----------------------|----------------------|----------------------|----------------------|
|                                |                   |                                |      |                   | T <sub>num</sub>    | $\Delta\mu(E)_{0.1}$ | $\Delta\mu(E)_{0.2}$ | $\Delta\mu(E)_{0.3}$ | $\Delta\mu(E)_{0.4}$ | $\Delta\mu(E)_{0.5}$ | $\Delta\mu(E)_{0.6}$ | $\Delta\mu(E)_{0.7}$ | $\Delta\mu(E)_{0.8}$ | $\Delta\mu(E)_{0.9}$ |
| Ag foil                        | 0                 | 0                              | K    | Ag                | 47                  | 67.86                | 71.60                | 73.80                | 75.49                | 77.34                | 79.40                | 81.50                | 83.35                | 85.65                |
| Ag <sub>2</sub> O              | 1                 | 0                              | K    | Ag                | 47                  | 67.83                | 71.57                | 73.44                | 74.82                | 76.35                | 78.16                | 80.34                | 82.58                | 85.01                |
| Co <sub>3</sub> O <sub>4</sub> | 2.5               | 1                              | K    | Co                | 27                  | 55.55                | 57.63                | 58.85                | 59.93                | 61.11                | 62.17                | 63.01                | 63.88                | 65.16                |
| CoO                            | 2                 | 1                              | K    | Co                | 27                  | 36.12                | 38.08                | 39.32                | 40.39                | 41.43                | 42.34                | 43.24                | 43.89                | 44.53                |
| Co foil                        | 0                 | 0                              | K    | Co                | 27                  | 46.09                | 47.65                | 48.96                | 51.58                | 54.44                | 55.91                | 57.68                | 59.58                | 61.51                |
| Fe <sub>2</sub> O <sub>3</sub> | 3                 | 2                              | K    | Fe                | 26                  | 53.09                | 55.14                | 56.00                | 56.78                | 57.51                | 58.27                | 59.05                | 59.71                | 60.33                |
| Fe foil                        | 0                 | 0                              | K    | Fe                | 26                  | 44.67                | 46.02                | 47.71                | 51.48                | 53.02                | 54.32                | 55.73                | 57.98                | 61.10                |
| Fe <sub>3</sub> O <sub>4</sub> | 2.5               | 1                              | K    | Fe                | 26                  | 54.32                | 56.39                | 57.53                | 58.50                | 59.43                | 60.28                | 61.07                | 61.94                | 62.88                |
| FeO                            | 2                 | 1                              | K    | Fe                | 26                  | 51.59                | 53.98                | 55.01                | 55.88                | 56.70                | 57.67                | 58.54                | 59.28                | 59.97                |
| MoO                            | 2                 | 1                              | K    | Mo                | 42                  | 52.95                | 57.59                | 62.54                | 64.36                | 65.71                | 66.87                | 67.82                | 68.76                | 69.74                |
| Mo foil                        | 0                 | 0                              | K    | Mo                | 42                  | 57.50                | 60.26                | 62.45                | 64.67                | 66.89                | 69.01                | 70.79                | 72.34                | 73.89                |
| Pd foil                        | 0                 | 0                              | K    | Pd                | 46                  | 66.94                | 71.15                | 73.68                | 75.90                | 78.06                | 80.12                | 82.09                | 84.10                | 86.52                |
| PdO                            | 2                 | 1                              | K    | Pd                | 46                  | 67.26                | 71.47                | 74.25                | 76.35                | 78.41                | 80.46                | 82.27                | 83.83                | 85.32                |
| Rh foil                        | 0                 | 0                              | K    | Rh                | 45                  | 40.88                | 45.00                | 47.62                | 49.69                | 52.00                | 54.55                | 56.78                | 58.83                | 61.33                |
| Rh <sub>2</sub> O <sub>3</sub> | 3                 | 2                              | K    | Rh                | 45                  | 43.00                | 47.37                | 50.11                | 52.27                | 53.82                | 55.33                | 56.71                | 58.03                | 59.53                |
| Ti foil                        | 0                 | 0                              | K    | Ti                | 22                  | 44.98                | 45.57                | 45.92                | 46.33                | 46.82                | 53.30                | 54.35                | 55.42                | 56.64                |
| TiO <sub>2</sub>               | 4                 | 2                              | K    | Ti                | 22                  | 44.02                | 51.66                | 52.58                | 53.24                | 54.07                | 55.84                | 56.84                | 57.66                | 58.33                |
| Ti <sub>2</sub> O <sub>3</sub> | 3                 | 2                              | K    | Ti                | 22                  | 46.87                | 51.55                | 53.23                | 54.16                | 55.01                | 55.89                | 56.96                | 58.15                | 59.36                |
| V foil                         | 0                 | 0                              | K    | V                 | 23                  | 2.18                 | 2.74                 | 5.90                 | 8.08                 | 11.32                | 12.69                | 14.39                | 16.46                | 18.87                |
| VO <sub>2</sub>                | 4                 | 2                              | K    | V                 | 23                  | 1.63                 | 2.42                 | 3.06                 | 12.95                | 13.88                | 14.77                | 15.61                | 16.41                | 17.17                |
| VO                             | 2                 | 1                              | K    | V                 | 23                  | 13.76                | 15.78                | 17.14                | 20.05                | 21.38                | 23.21                | 24.99                | 26.61                | 28.39                |
| V <sub>2</sub> O <sub>5</sub>  | 5                 | 2                              | K    | V                 | 23                  | 3.69                 | 4.48                 | 4.76                 | 5.04                 | 5.32                 | 6.20                 | 18.66                | 19.73                | 20.59                |
| V <sub>2</sub> O <sub>3</sub>  | 3                 | 2                              | K    | V                 | 23                  | 5.00                 | 10.47                | 11.48                | 12.34                | 13.25                | 14.20                | 15.16                | 16.08                | 16.87                |



**Table S- 2 The list of data used for oxidation state prediction.**

| Name of Oxide     | Trained descriptors |                    |                    |                    |                    |                    |                    |                    |                    |                    |
|-------------------|---------------------|--------------------|--------------------|--------------------|--------------------|--------------------|--------------------|--------------------|--------------------|--------------------|
|                   | T <sub>num</sub>    | $\Delta\mu(E)=0.1$ | $\Delta\mu(E)=0.2$ | $\Delta\mu(E)=0.3$ | $\Delta\mu(E)=0.4$ | $\Delta\mu(E)=0.5$ | $\Delta\mu(E)=0.6$ | $\Delta\mu(E)=0.7$ | $\Delta\mu(E)=0.8$ | $\Delta\mu(E)=0.9$ |
| Cu-foil           | 29                  | 7.49671            | 8.65836            | 9.47834            | 10.23596           | 15.0762            | 17.17498           | 18.79599           | 20.15169           | 21.3928            |
| CuO               | 29                  | 11.61854           | 13.15497           | 14.06559           | 15.45102           | 17.93745           | 19.10673           | 20.09161           | 20.79723           | 21.50284           |
| Cu <sub>2</sub> O | 29                  | 45.94438           | 49.25226           | 52.17972           | 54.42547           | 56.03967           | 57.25297           | 58.32525           | 59.23256           | 60.1393            |
| Nb-foil           | 41                  | 34.87828           | 37.75439           | 39.89872           | 41.93509           | 44.44644           | 46.94628           | 48.83271           | 50.56057           | 52.24945           |
| NbO               | 41                  | 39.27371           | 42.65305           | 44.86342           | 46.6414            | 48.33328           | 50.02334           | 51.83187           | 53.64515           | 55.36128           |
| NbO <sub>2</sub>  | 41                  | 40.51781           | 44.50858           | 47.34046           | 49.44839           | 51.13021           | 52.5735            | 53.88183           | 55.1746            | 56.51443           |
| Zn-foil           | 30                  | 29.87923           | 31.27251           | 31.99473           | 32.71694           | 33.34076           | 33.95263           | 34.5645            | 35.63119           | 36.88523           |
| ZnO               | 30                  | 31.63073           | 33.19231           | 33.96574           | 34.69648           | 35.07969           | 35.4629            | 35.8461            | 36.22931           | 36.7778            |
| Zr-foil           | 40                  | 40.49092           | 42.72216           | 44.11548           | 45.43669           | 48.89947           | 51.14169           | 52.50997           | 53.74389           | 54.96115           |
| ZrO <sub>2</sub>  | 40                  | 45.94438           | 49.25226           | 52.17972           | 54.42547           | 56.03967           | 57.25297           | 58.32525           | 59.23256           | 60.1393            |
